# Supplementary material for: Insights into AMS/PCAT transporters from biochemical and structural characterization of a double Glycine motif protease
Source: eLife journal article supplement (doi:10.7554/elife.42305), 2019-01-14

**A****XY33a****ProcA 2.8 (11-82)****ProcA 2.8 (21-82)****ProcA 2.8 (31-82)****XY33a truncant****Synthetic peptide**

G S S H<sub>6</sub> S Q D P S E E Q L K A F L T K V Q A D T S L Q E Q L K I E G A D V V A I A K A A G F S I T T E D L N S H R Q N L S D D E L E G V A G G  
 G S S H<sub>6</sub> S Q D P N S M K V Q A D T S L Q E Q L K I E G A D V V A I A K A A G F S I T T E D L N S H R Q N L S D D E L E G V A G G  
 G S S H<sub>6</sub> S Q D P N S M - - - - - Q L K I E G A D V V A I A K A A G F S I T T E D L N S H R Q N L S D D E L E G V A G G  
 G S S H<sub>6</sub> S Q D P N S M - - - - - A I A K A A G F S I T T E D L N S H R Q N L S D D E L E G V A G G  
 Q N L S D D E L E G V A G G  
 N L S D D E L E G V A G G

**LahT150**  
**Cleavage Site**

A A C H F L L F S M P P S H V L D I C  
 A A C H N H A P S M P P S Y W E G E C  
 A A C H N H A P S M P P S Y W E G E C  
 A A C H N H A P S M P P S Y W E G E C  
 A A C H F L L F S M P P S H V L D I C  
 A A S L

**B ProcA 2.8 (11-82)**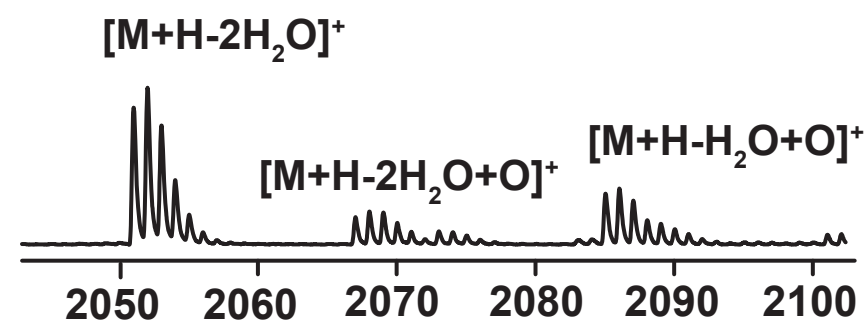**C ProcA 2.8 (21-82)**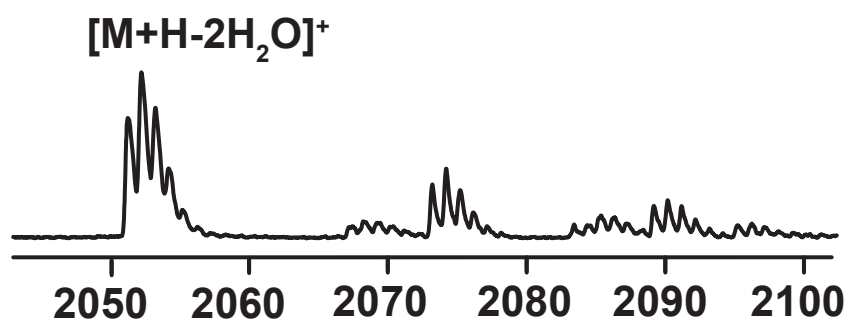**D ProcA 2.8 (31-82)**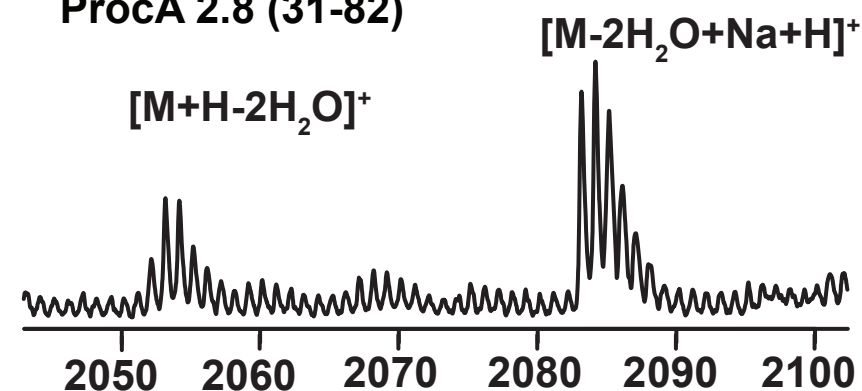**E XY33a truncant-LahT150**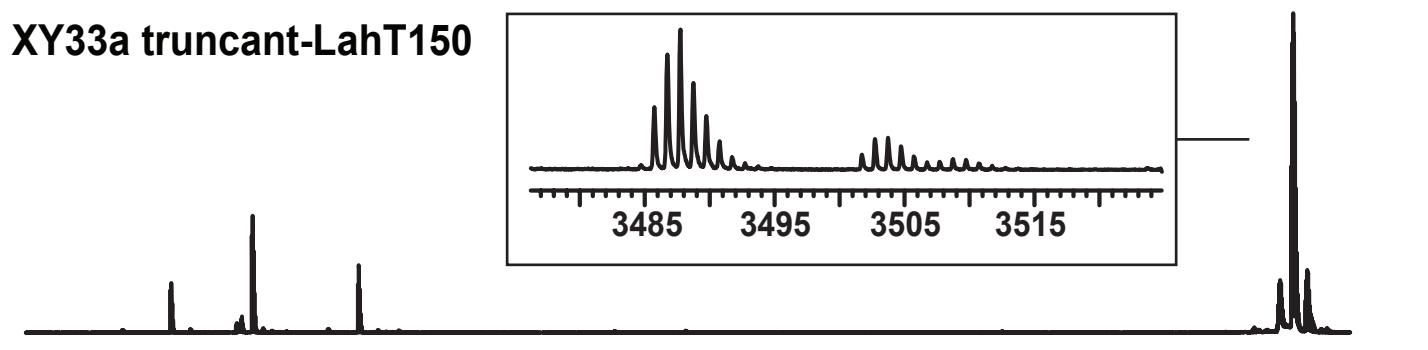**XY33a truncant+LahT150**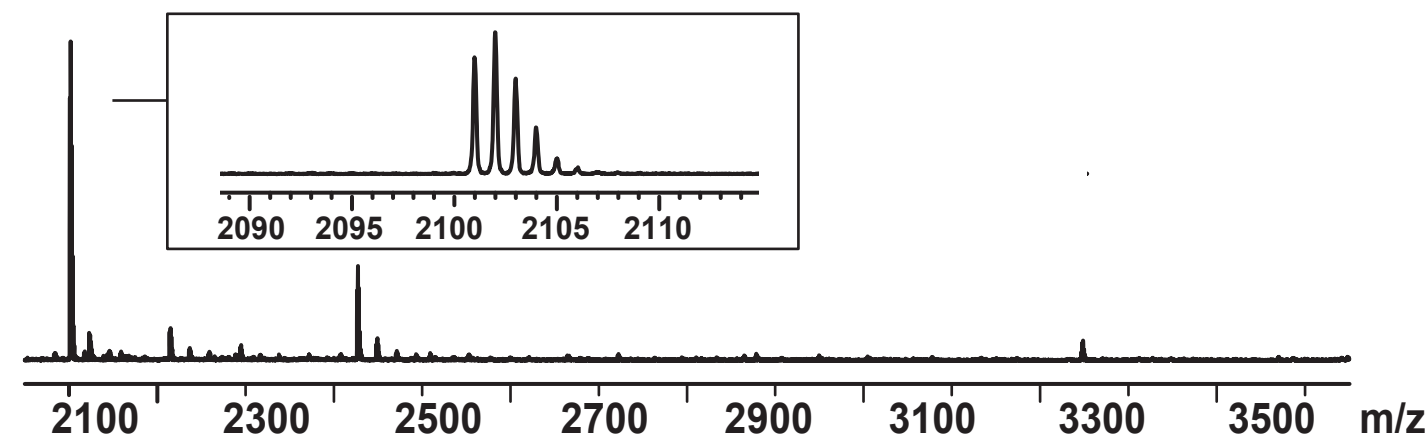**F Synthetic peptide - LahT150**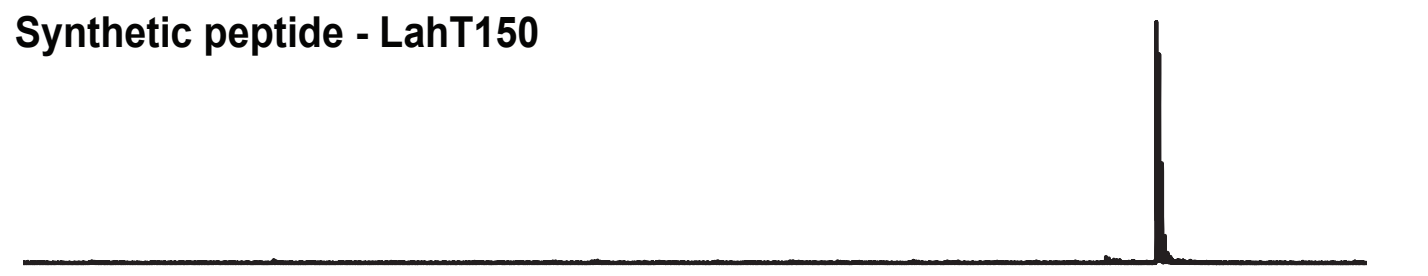**Synthetic peptide + LahT150**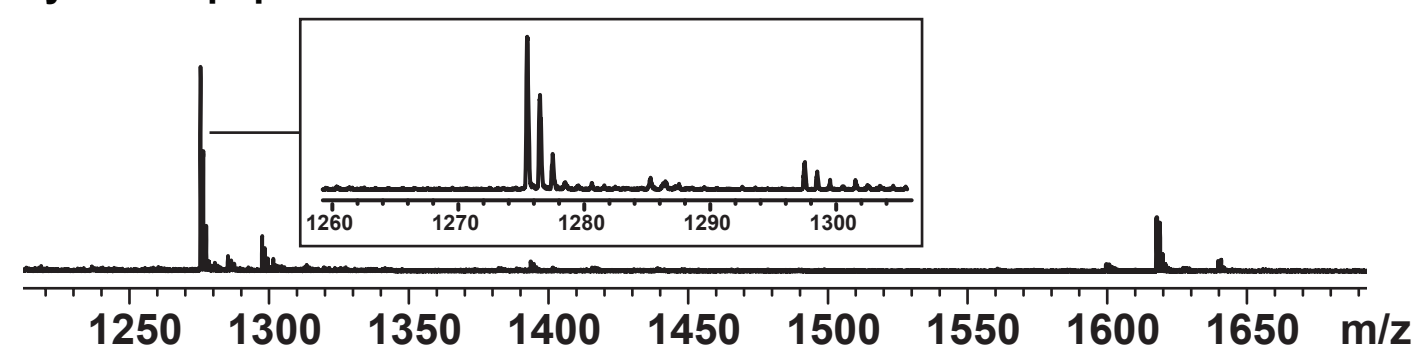

Supplement: supp [file elife-42305-supp-v1.zip]
