# Supplementary figures and images for: Insights into AMS/PCAT transporters from biochemical and structural characterization of a double Glycine motif protease
Source: eLife journal article supplement (doi:10.7554/elife.42305), 2019-01-14

LahA1

Core peptide

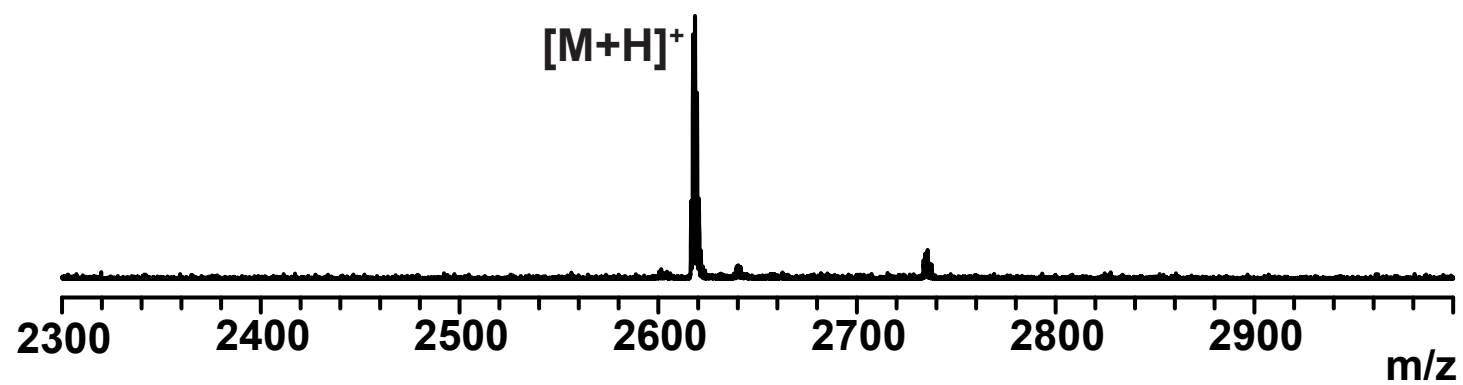

Leader peptide

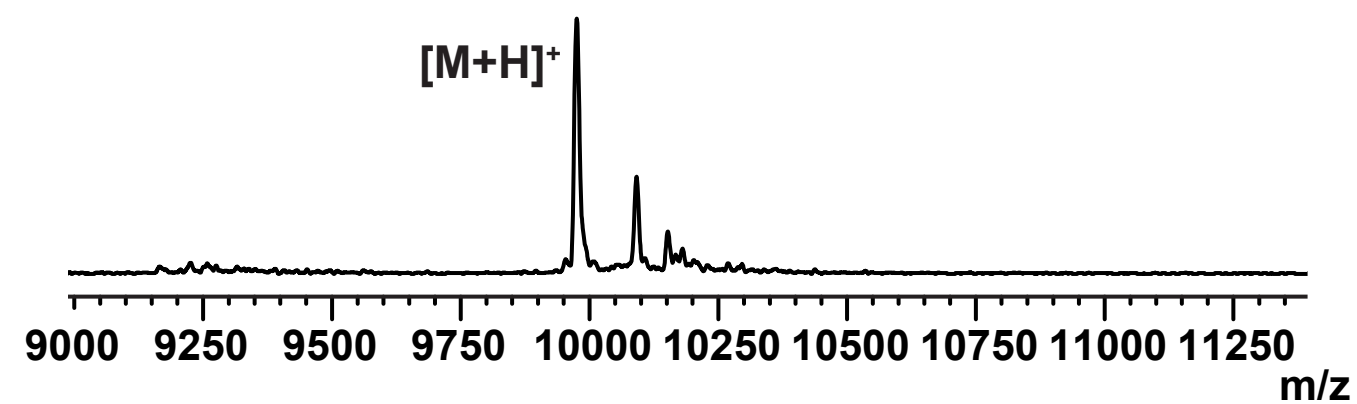

LahA2

$[M+H]^+$

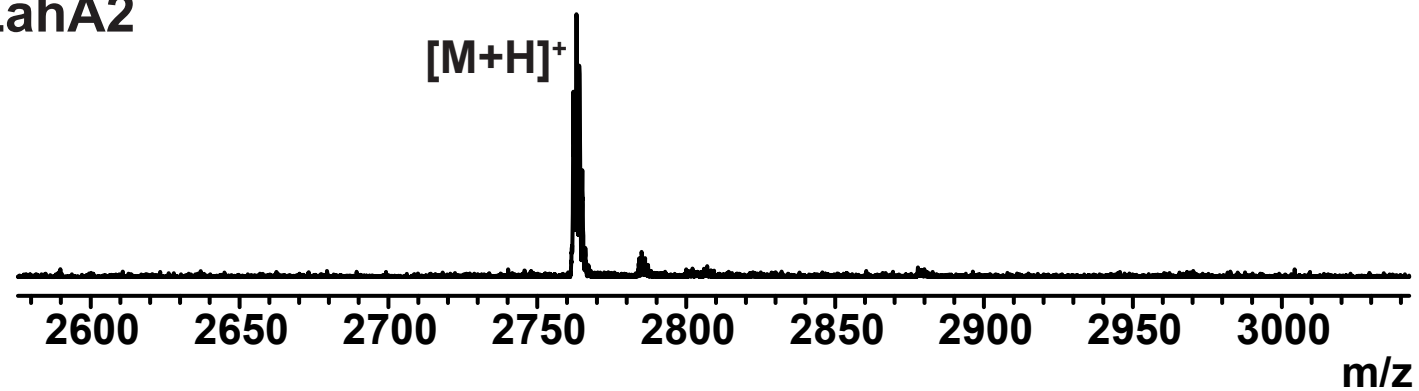

$[M+H]^+$

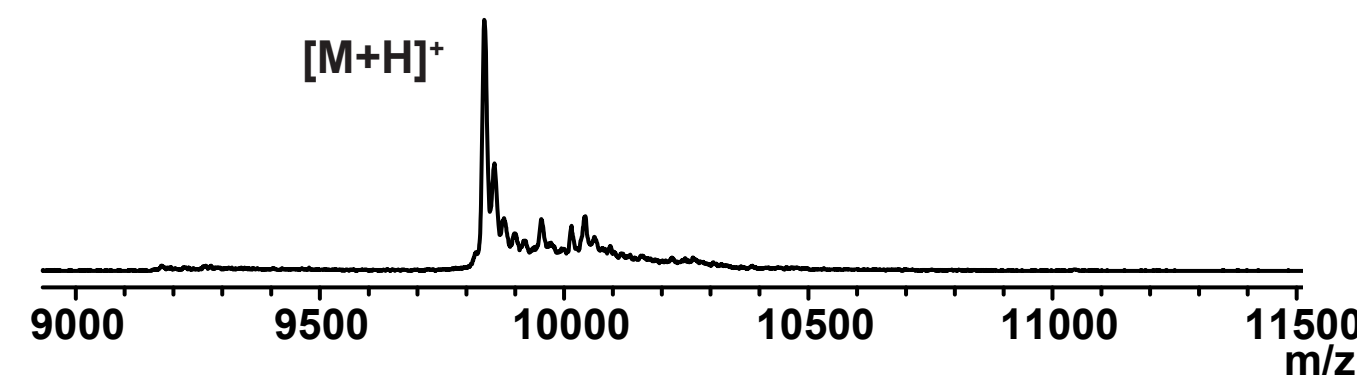

LahA3

$[M+H]^+$

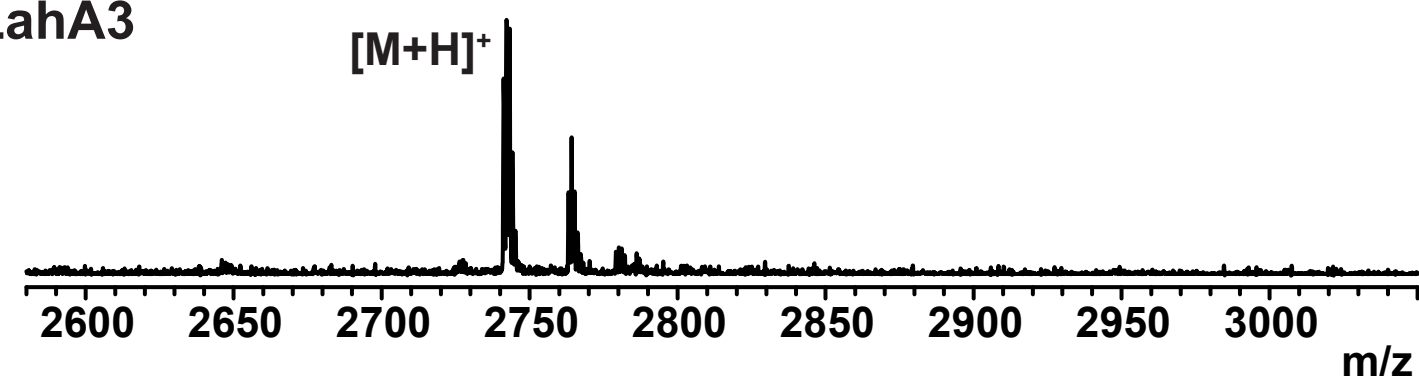

$[M+H]^+$

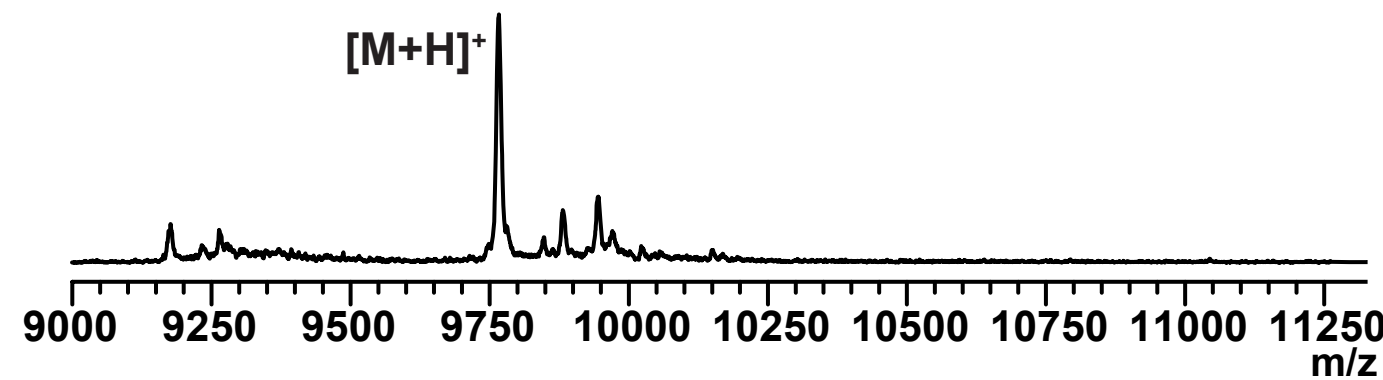

LahA5

$[M+H]^+$

$[M+H+Na]^+$

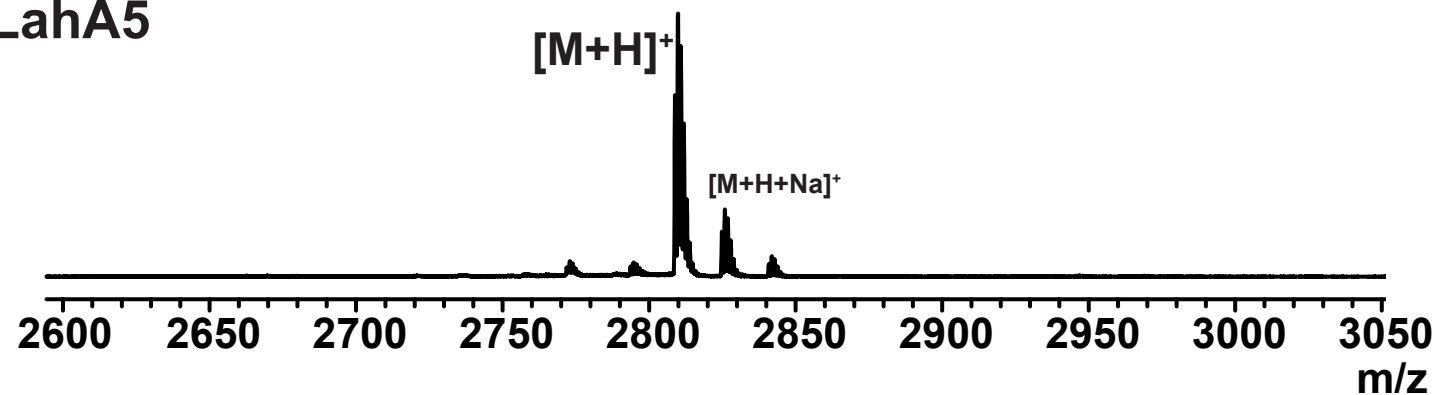

$[M+H]^+$

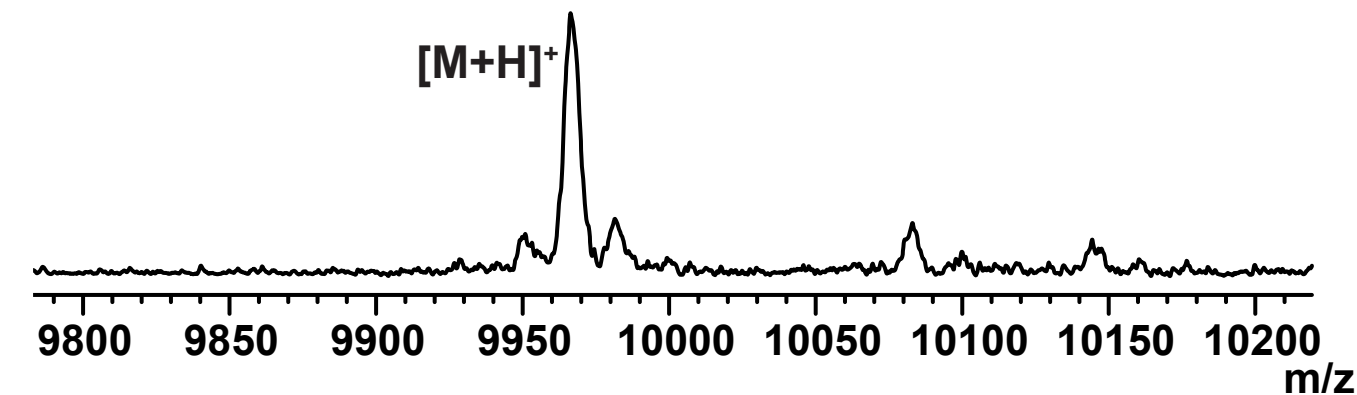

LahA6

$[M+H]^+$

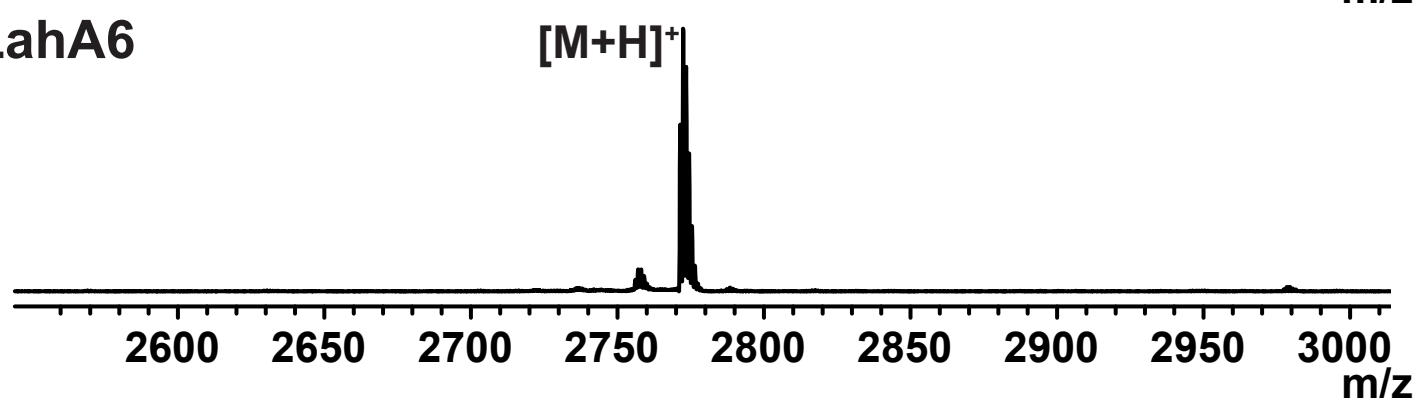

$[M+H]^+$

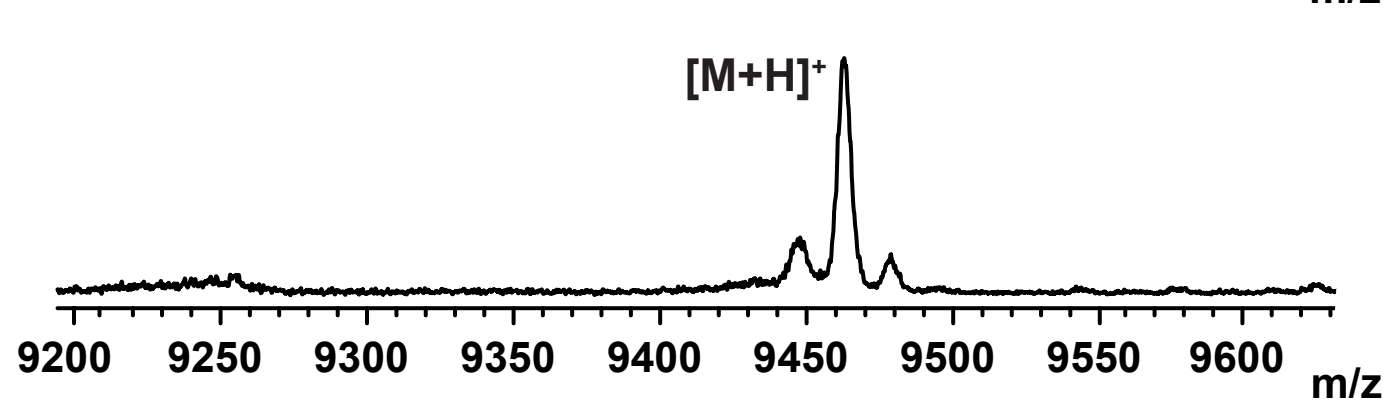

Supplement: supp [file elife-42305-supp-v1.zip]

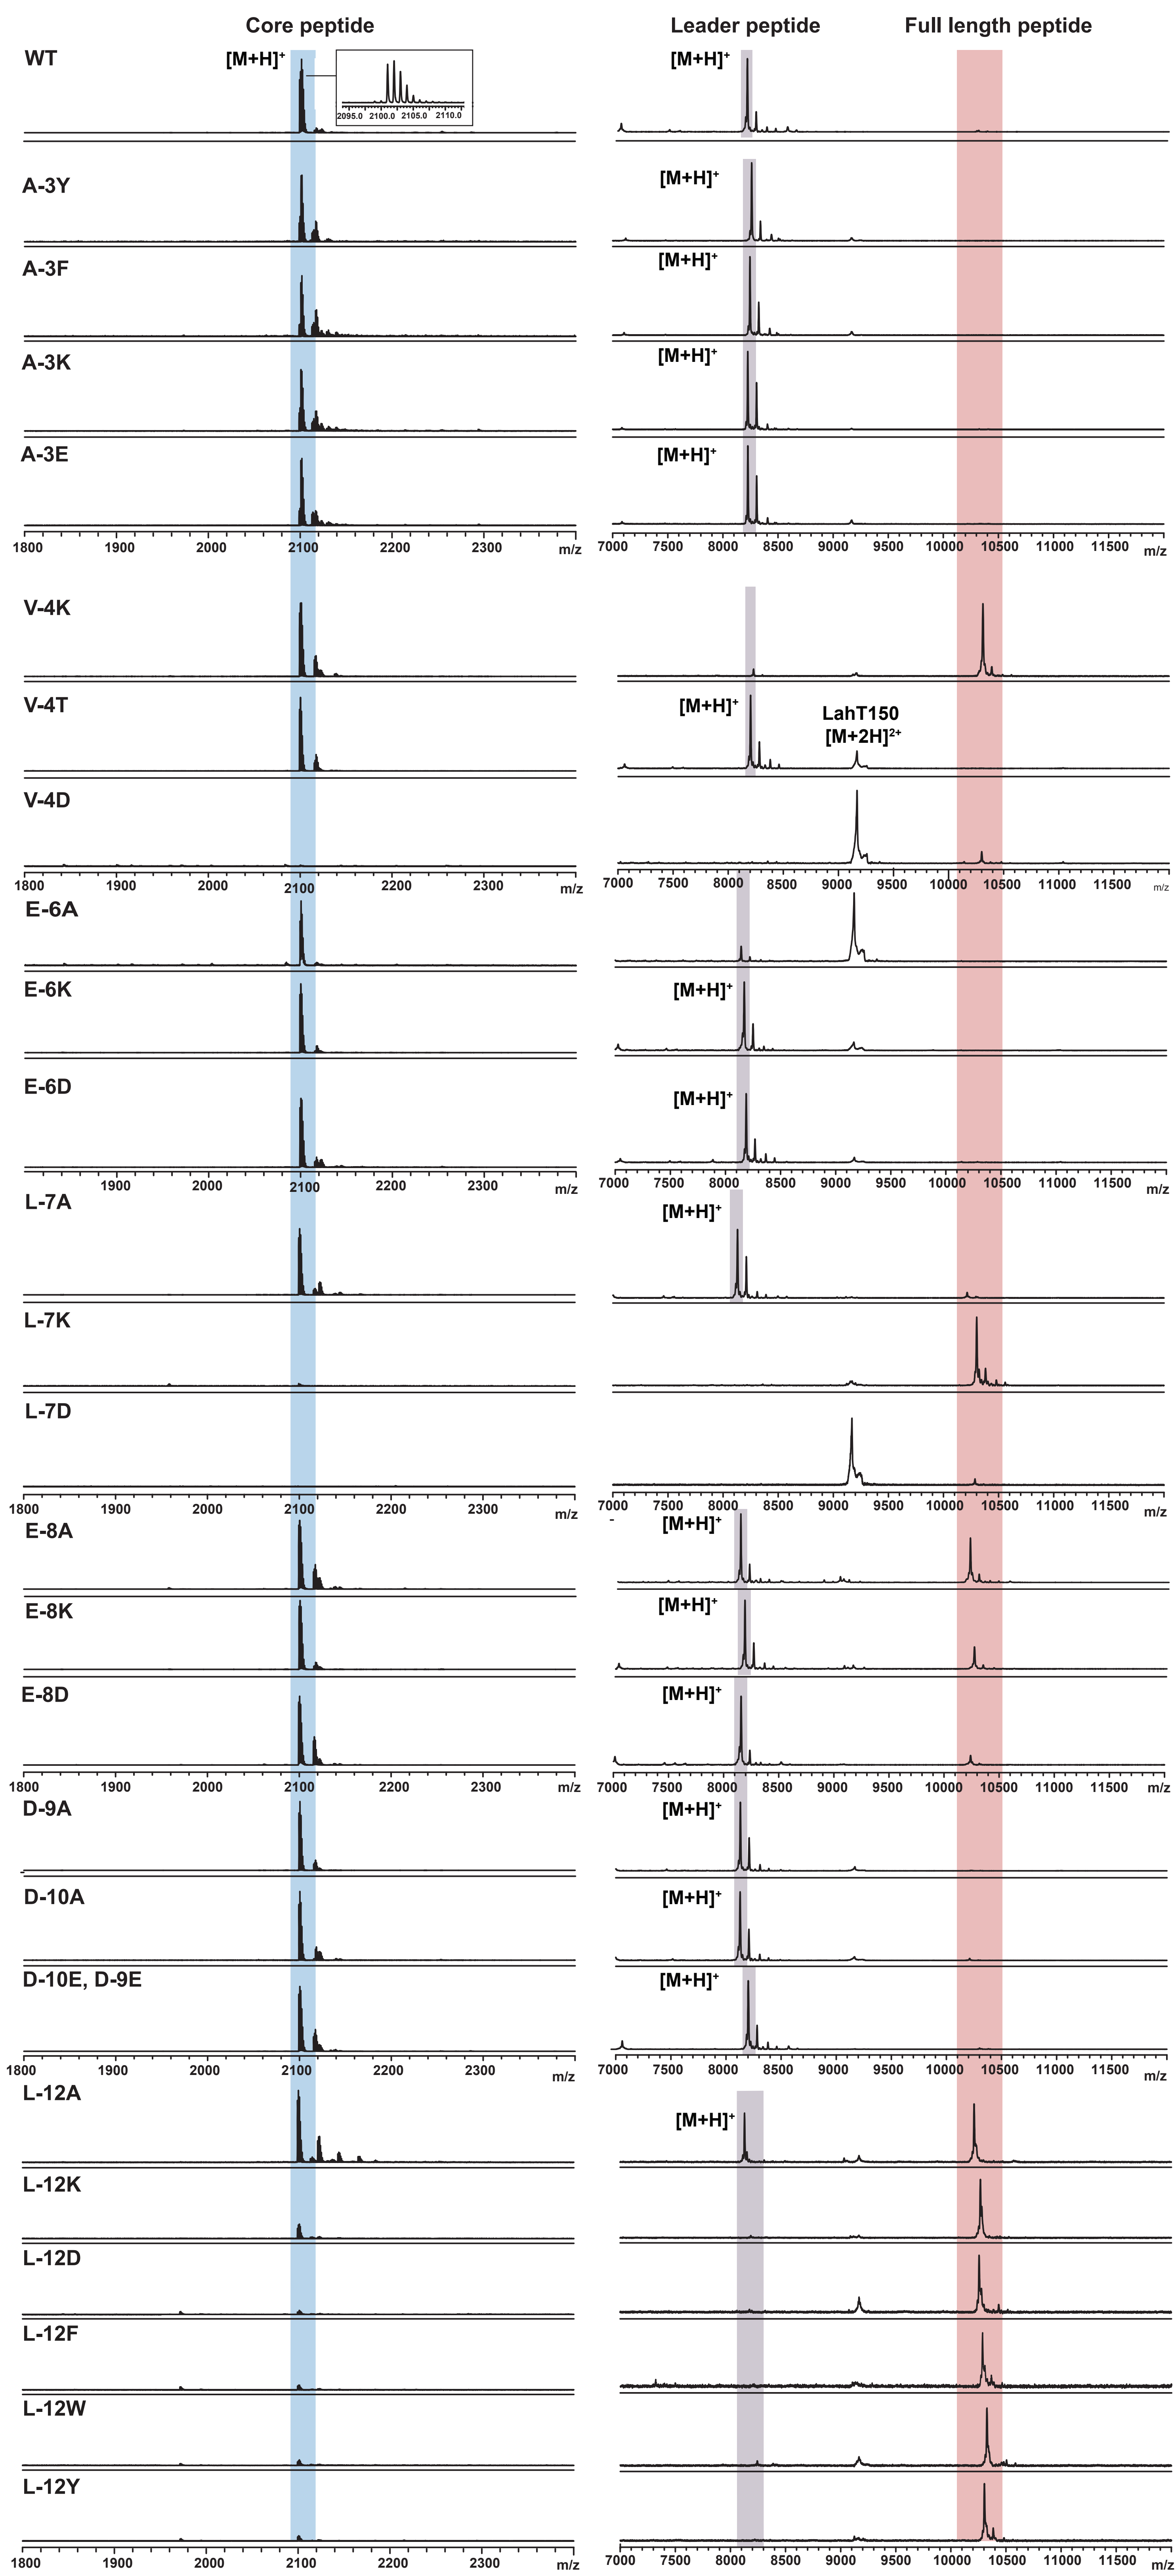

Supplement: supp [file elife-42305-supp-v1.zip]
